# Supplementary material for: Bridging gas and aerosol properties between the northeastern US and Bermuda: analysis of eight transit flights
Source: Copernicus journal article supplement (doi:10.5194/acp-24-10385-2024), 2024-09-19
Supplement: Supplementary file [file acp-24-10385-2024-supplement.pdf]

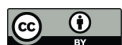

*Supplement of*

## **Bridging gas and aerosol properties between the northeastern US and Bermuda: analysis of eight transit flights**

**Cassidy Soloff et al.**

*Correspondence to:* Armin Sorooshian ([armin@arizona.edu](mailto:armin@arizona.edu))

The copyright of individual parts of the supplement might differ from the article licence.

**Table S1: Two-mode, lognormal model results for aerosol number concentration (N) for different bins of distance relative to LaRC.  $N_1$  represents the mode corresponding to the smaller  $D_{p,g}$  while  $N_2$  corresponds to the larger  $D_{p,g}$ . The bolded values represent the measurements made within the smoke layer, which correspond to the FT measurements made on 22 March 2022 in the 550 – 800 km range. Blank cells indicate unavailable data or when the data can be better represented by a single mode.**

| <b>Boundary Layer</b>   |           |                                           |                                           |                                           |                                           |                                           |                                           |                                           |                                           |
|-------------------------|-----------|-------------------------------------------|-------------------------------------------|-------------------------------------------|-------------------------------------------|-------------------------------------------|-------------------------------------------|-------------------------------------------|-------------------------------------------|
| <b>Date</b>             | <b>RF</b> | <b>&lt; 300 km</b>                        |                                           | <b>300 – 550 km</b>                       |                                           | <b>550 – 800 km</b>                       |                                           | <b>800 – 1100 km</b>                      |                                           |
|                         |           | <b><math>N_1</math> [cm<sup>-3</sup>]</b> | <b><math>N_2</math> [cm<sup>-3</sup>]</b> | <b><math>N_1</math> [cm<sup>-3</sup>]</b> | <b><math>N_2</math> [cm<sup>-3</sup>]</b> | <b><math>N_1</math> [cm<sup>-3</sup>]</b> | <b><math>N_2</math> [cm<sup>-3</sup>]</b> | <b><math>N_1</math> [cm<sup>-3</sup>]</b> | <b><math>N_2</math> [cm<sup>-3</sup>]</b> |
| 22 March 2022           | 142       | 6980.9                                    | 6005.5                                    | 5367.5                                    | 6661.1                                    | 4083.6                                    | 3414.3                                    | 2312.1                                    | 1155.2                                    |
|                         | 143       | 1469.7                                    | 12155.5                                   | 2846.9                                    | 8121.2                                    | 3186.2                                    | 4589.1                                    | 2282.6                                    | 1234.3                                    |
| 18 May 2022             | 156       | 5941.9                                    | 1790.4                                    | 2350.2                                    | 3659.6                                    | 1548.5                                    | 2668.6                                    | 1476.5                                    | 491.9                                     |
|                         | 157       | 5613.6                                    | 1466.1                                    | 4483.8                                    | 2027.0                                    | 1389.1                                    | 2995.5                                    | 1931.4                                    | 795.0                                     |
| 21 May 2022             | 159       | 4246.9                                    | 355.8                                     | 2157.1                                    | 1119.7                                    | 1765.8                                    | 968.1                                     | 1332.2                                    | 837.1                                     |
|                         | 160       | 864.7                                     | 4256.3                                    | 1285.2                                    | 562.9                                     | 1178.6                                    | 517.6                                     | 1027.0                                    | 562.6                                     |
| 31 May 2022             | 161       | 341.1                                     | 4005.5                                    | 261.3                                     | 3170.6                                    | 623.5                                     | 3172.0                                    | 853.5                                     | 2506.4                                    |
| 18 June 2022            | 179       | 7380.9                                    | 3645.1                                    | 2943.7                                    | 2746.8                                    | 882.8                                     | 538.3                                     | 832.3                                     | 324.4                                     |
| <b>Free Troposphere</b> |           |                                           |                                           |                                           |                                           |                                           |                                           |                                           |                                           |
| 22 March 2022           | 142       | 2272.1                                    | 10005.2                                   | 2065.6                                    | 9932.0                                    | 1866.2                                    | 4681.1                                    | 1040.3                                    | 3488.9                                    |
|                         | 143       | 11457.9                                   |                                           | 1386.9                                    | 7239.2                                    | <b>4118.5</b>                             | <b>2711.0</b>                             | 2489.1                                    | 4157.7                                    |
| 18 May 2022             | 156       | 3819.2                                    | 4425.2                                    | 5308.5                                    | 1240.9                                    | 3054.6                                    | 2454.0                                    | 2131.1                                    | 503.5                                     |
|                         | 157       | 6567.1                                    | 4754.9                                    | 5989.1                                    | 2475.2                                    | 4772.4                                    | 1161.7                                    | 1273.1                                    | 952.1                                     |
| 21 May 2022             | 159       | 5149.1                                    | 1281.6                                    | 2923.4                                    | 772.5                                     | 3379.5                                    | 874.6                                     | 224.8                                     | 4154.9                                    |
|                         | 160       | 4326.1                                    | 1287.0                                    | 1592.8                                    | 1149.2                                    | 2240.2                                    | 228.0                                     | 1925.2                                    | 529.5                                     |
| 31 May 2022             | 161       | 1264.8                                    | 3571.9                                    | 243.7                                     | 3567.2                                    | 1205.3                                    | 162.6                                     | 260.9                                     | 2728.3                                    |
| 18 June 2022            | 179       |                                           |                                           |                                           |                                           | 1908.0                                    | 2027.6                                    | 1211.8                                    | 311.1                                     |

**Table S2: Two-mode, lognormal model results for geometric mean diameter ( $D_{p,g}$ ) for different bins of distance relative to LaRC.  $D_{p,g,1}$  is smaller than  $D_{p,g,2}$ . The bolded values represent the measurements made within the smoke layer, which correspond to the FT measurements made on 22 March 2022 in the 550 – 800 km range. Blank cells indicate unavailable data or when the data can be better represented by a single mode.**

| <b>Boundary Layer</b>   |           |                                    |                                    |                                    |                                    |                                    |                                    |                                    |                                    |
|-------------------------|-----------|------------------------------------|------------------------------------|------------------------------------|------------------------------------|------------------------------------|------------------------------------|------------------------------------|------------------------------------|
| <b>Date</b>             | <b>RF</b> | <b>&lt; 300 km</b>                 |                                    | <b>300 – 550 km</b>                |                                    | <b>550 – 800 km</b>                |                                    | <b>800 – 1100 km</b>               |                                    |
|                         |           | <b><math>D_{p,g,1}</math> [nm]</b> | <b><math>D_{p,g,2}</math> [nm]</b> | <b><math>D_{p,g,1}</math> [nm]</b> | <b><math>D_{p,g,2}</math> [nm]</b> | <b><math>D_{p,g,1}</math> [nm]</b> | <b><math>D_{p,g,2}</math> [nm]</b> | <b><math>D_{p,g,1}</math> [nm]</b> | <b><math>D_{p,g,2}</math> [nm]</b> |
| 22 March 2022           | 142       | 39.34                              | 89.88                              | 33.33                              | 76.71                              | 25.56                              | 82.95                              | 25.08                              | 102.94                             |
|                         | 143       | 60.53                              | 81.17                              | 41.79                              | 74.42                              | 29.75                              | 68.04                              | 25.07                              | 103.88                             |
| 18 May 2022             | 156       | 39.70                              | 119.18                             | 38.63                              | 109.72                             | 42.10                              | 110.29                             | 61.69                              | 188.53                             |
|                         | 157       | 46.56                              | 132.17                             | 41.39                              | 114.43                             | 38.72                              | 102.60                             | 57.81                              | 176.39                             |
| 21 May 2022             | 159       | 82.95                              | 228.82                             | 78.12                              | 208.64                             | 80.43                              | 208.48                             | 71.24                              | 198.25                             |
|                         | 160       | 75.13                              | 87.35                              | 55.80                              | 184.25                             | 54.70                              | 183.67                             | 59.82                              | 186.15                             |
| 31 May 2022             | 161       | 37.09                              | 106.94                             | 40.90                              | 97.94                              | 42.08                              | 99.96                              | 45.11                              | 107.20                             |
| 18 June 2022            | 179       | 53.88                              | 118.30                             | 48.97                              | 126.17                             | 43.44                              | 154.91                             | 40.44                              | 168.78                             |
| <b>Free Troposphere</b> |           |                                    |                                    |                                    |                                    |                                    |                                    |                                    |                                    |
| 22 March 2022           | 142       | 31.09                              | 64.22                              | 29.08                              | 64.16                              | 33.54                              | 113.50                             | 29.31                              | 98.99                              |
|                         | 143       | 66.99                              |                                    | 28.34                              | 69.30                              | <b>95.71</b>                       | <b>207.68</b>                      | 36.02                              | 118.08                             |
| 18 May 2022             | 156       | 35.22                              | 131.11                             | 69.84                              | 143.16                             | 42.68                              | 119.01                             | 79.89                              | 200.47                             |
|                         | 157       | 53.87                              | 56.97                              | 46.16                              | 93.40                              | 75.81                              | 158.95                             | 61.59                              | 175.73                             |
| 21 May 2022             | 159       | 77.76                              | 217.71                             | 87.56                              | 209.76                             | 97.44                              | 230.23                             | 74.23                              | 143.82                             |
|                         | 160       | 70.39                              | 198.25                             | 81.63                              | 169.62                             | 102.12                             | 191.31                             | 107.08                             | 211.02                             |
| 31 May 2022             | 161       | 76.56                              | 165.07                             | 38.50                              | 108.69                             | 51.37                              | 109.49                             | 34.62                              | 111.32                             |
| 18 June 2022            | 179       |                                    |                                    |                                    |                                    | 48.90                              | 144.12                             | 33.51                              | 107.44                             |

Table S3: Two-mode, lognormal model results for the geometric standard deviation parameter ( $\sigma_g$ ) for different bins of distance relative to LaRC.  $\sigma_{g,1}$  represents the mode corresponding to the smaller  $D_{p,g}$  while  $\sigma_{g,2}$  corresponds to the larger  $D_{p,g}$ . The bolded values represent the measurements made within the smoke layer, which correspond to the FT measurements made on 22 March 2022 in the 550 – 800 km range. Blank cells indicate unavailable data or when the data can be better represented by a single mode.

| <b>Boundary Layer</b>   |     |                |                |                |                |                |                |                |                |
|-------------------------|-----|----------------|----------------|----------------|----------------|----------------|----------------|----------------|----------------|
| Date                    | RF  | < 300 km       |                | 300 – 550 km   |                | 550 – 800 km   |                | 800 – 1100 km  |                |
|                         |     | $\sigma_{g,1}$ | $\sigma_{g,2}$ | $\sigma_{g,1}$ | $\sigma_{g,2}$ | $\sigma_{g,1}$ | $\sigma_{g,2}$ | $\sigma_{g,1}$ | $\sigma_{g,2}$ |
| 22 March 2022           | 142 | 1.47           | 1.64           | 1.42           | 1.78           | 1.55           | 1.71           | 1.86           | 1.28           |
|                         | 143 | 1.24           | 1.78           | 1.34           | 1.75           | 1.44           | 1.90           | 1.68           | 1.31           |
| 18 May 2022             | 156 | 1.49           | 1.37           | 1.47           | 1.52           | 1.55           | 1.49           | 1.76           | 1.31           |
|                         | 157 | 1.47           | 1.33           | 1.38           | 1.44           | 1.46           | 1.53           | 1.63           | 1.38           |
| 21 May 2022             | 159 | 2.01           | 1.23           | 1.68           | 1.34           | 1.73           | 1.35           | 1.54           | 1.31           |
|                         | 160 | 1.36           | 2.14           | 1.60           | 1.34           | 1.49           | 1.28           | 1.49           | 1.30           |
| 31 May 2022             | 161 | 1.31           | 1.75           | 1.25           | 1.76           | 1.26           | 1.72           | 1.39           | 1.67           |
| 18 June 2022            | 179 | 1.52           | 1.48           | 1.46           | 1.33           | 1.42           | 1.40           | 1.34           | 1.40           |
| <b>Free Troposphere</b> |     |                |                |                |                |                |                |                |                |
| 22 March 2022           | 142 | 1.29           | 1.82           | 1.23           | 1.96           | 1.43           | 1.69           | 1.52           | 1.60           |
|                         | 143 | 1.91           |                | 1.22           | 1.86           | <b>1.57</b>    | <b>1.38</b>    | 1.53           | 1.63           |
| 18 May 2022             | 156 | 1.48           | 1.53           | 1.91           | 1.31           | 1.58           | 1.50           | 1.82           | 1.29           |
|                         | 157 | 2.22           | 1.29           | 1.34           | 1.43           | 1.92           | 1.27           | 1.60           | 1.43           |
| 21 May 2022             | 159 | 1.84           | 1.43           | 1.91           | 1.30           | 1.84           | 1.34           | 1.06           | 1.66           |
|                         | 160 | 1.47           | 1.43           | 1.87           | 1.52           | 1.77           | 1.25           | 1.80           | 1.31           |
| 31 May 2022             | 161 | 1.28           | 1.49           | 1.21           | 1.77           | 2.27           | 1.23           | 1.30           | 1.71           |
| 18 June 2022            | 179 |                |                |                |                | 1.42           | 1.55           | 1.77           | 1.33           |

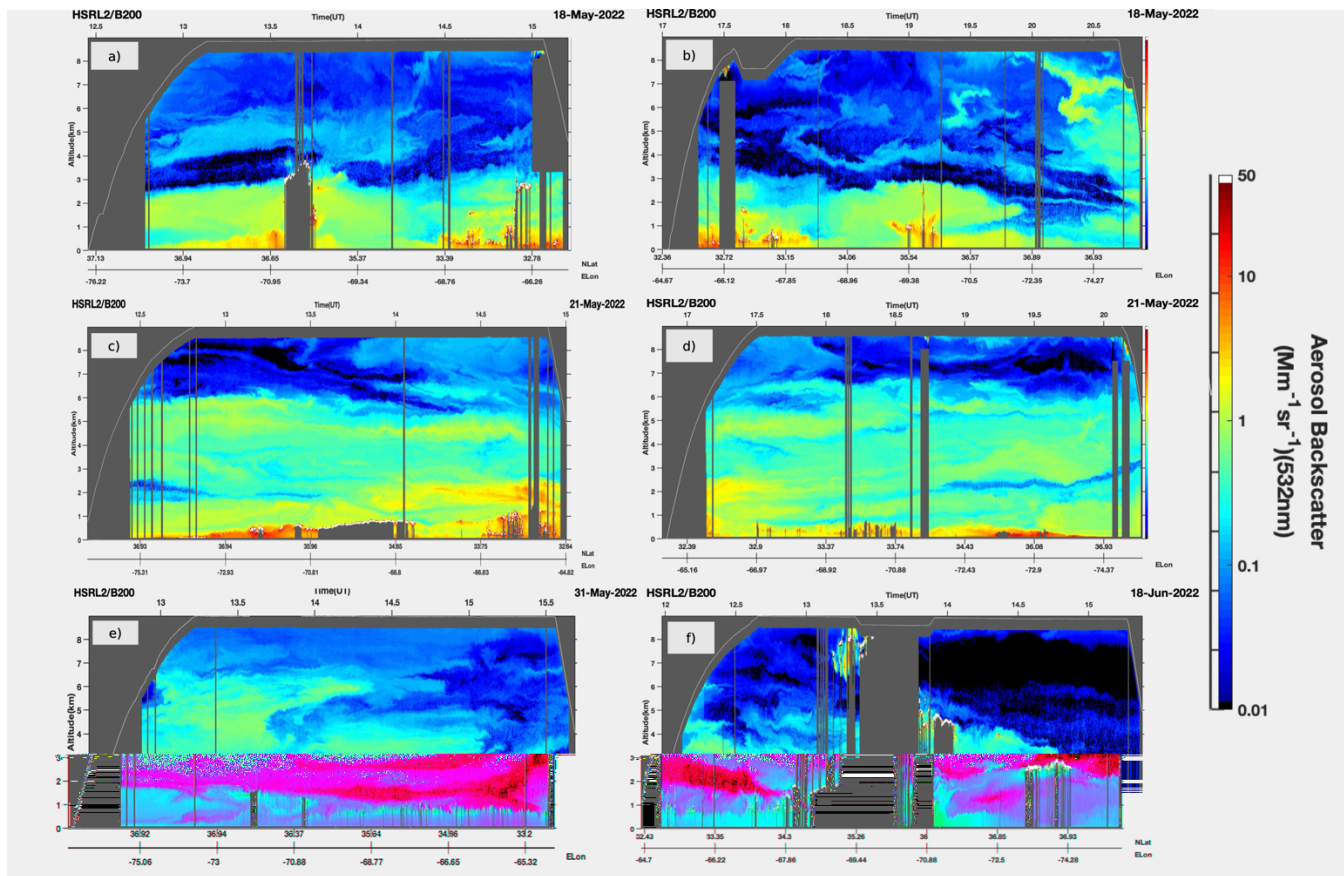

Figure S1: Aerosol backscatter (532 nm) for RFs 156 (a), 157 (b), 159 (c), 160 (d), 161 (e), and 179 (f).

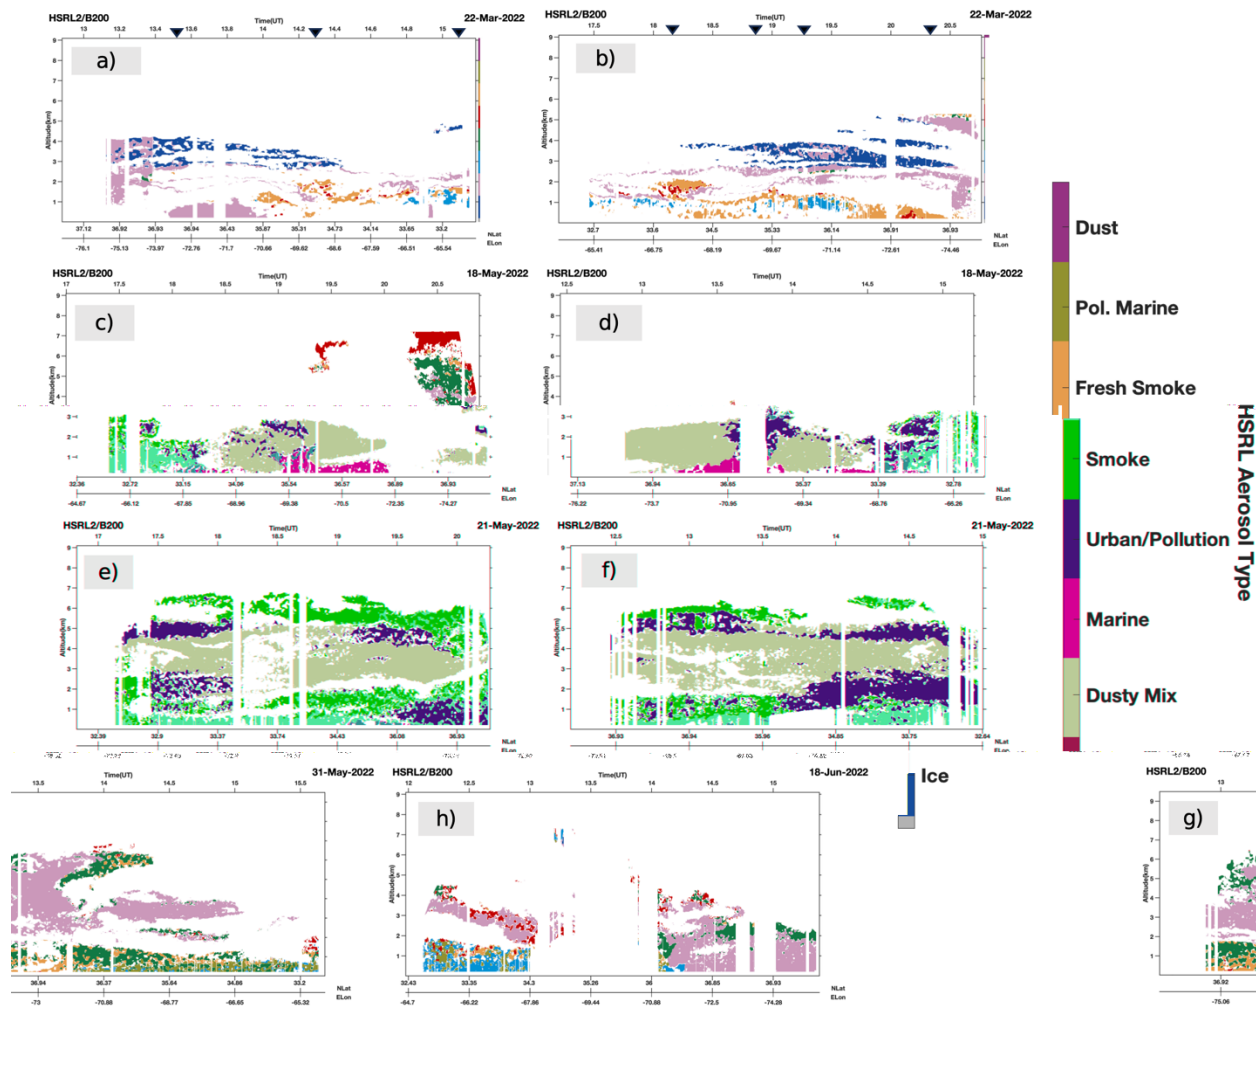

Figure S2: HSLR-2 aerosol type information for all eight transit flights: RFs 142 (a), 143 (b), 156 (c), 157 (d), 159 (e), 160 (f), 161 (g), and 179 (h).

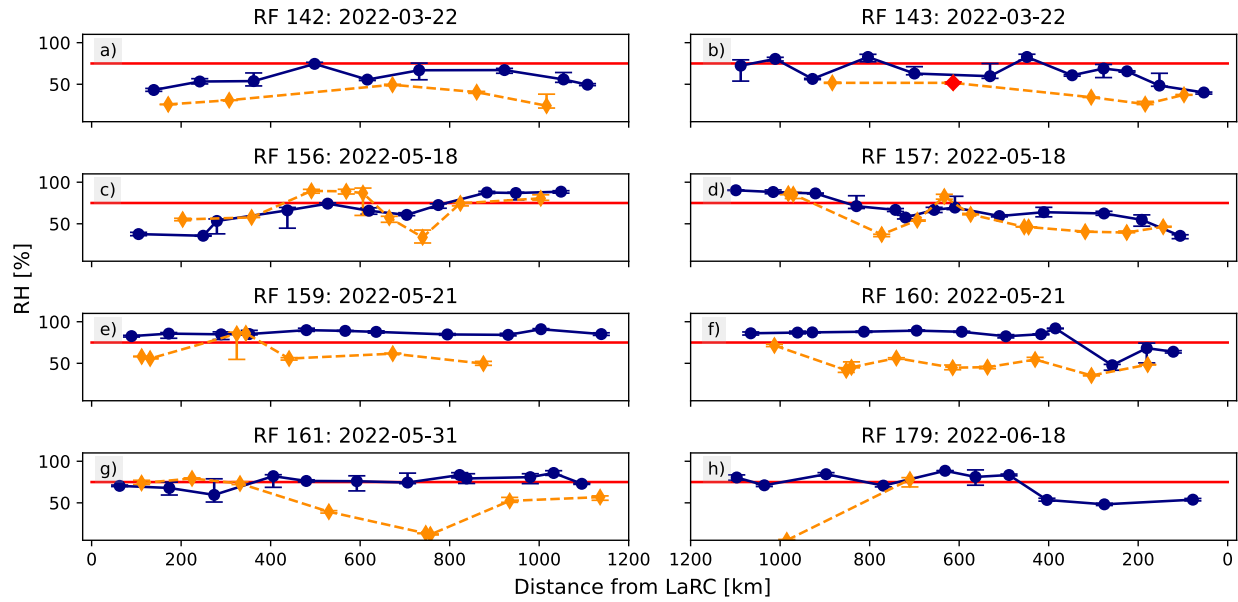

**Figure S3: Relative humidity for all eight transit flights as measured by the HU-25 Falcon. Blue and orange represent the BL and FT, respectively. Markers represent median values for 15-minute intervals and whiskers are 25<sup>th</sup>/75<sup>th</sup> percentiles. The red line represents 75% RH, which is the deliquescence point of sea salt (pure NaCl) particles. The smoke layer median value is shown in red for RF 143.**

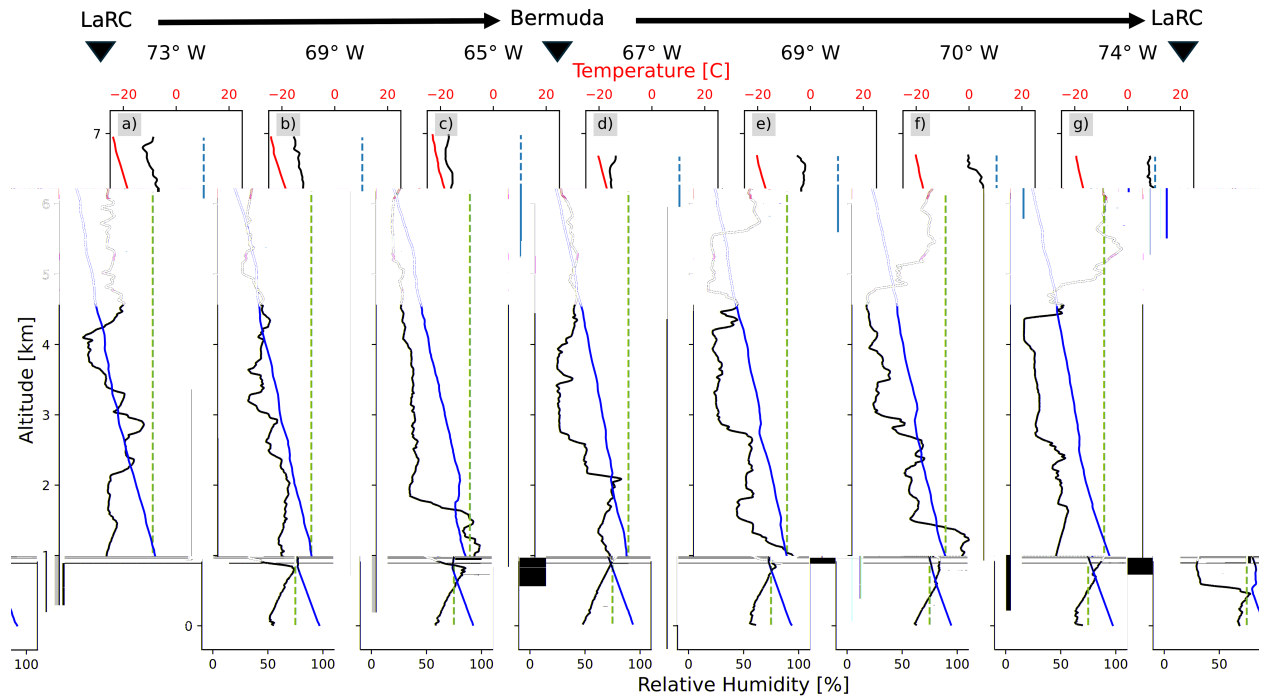

**Figure S4: Dropsonde relative humidity (black) and temperature (red) data for the RFs 142-143. The dashed blue vertical line represents 75% RH, which is the deliquescence point of sea salt (pure NaCl) particles. Locations of the dropsonde launches are shown in Figure 3.**



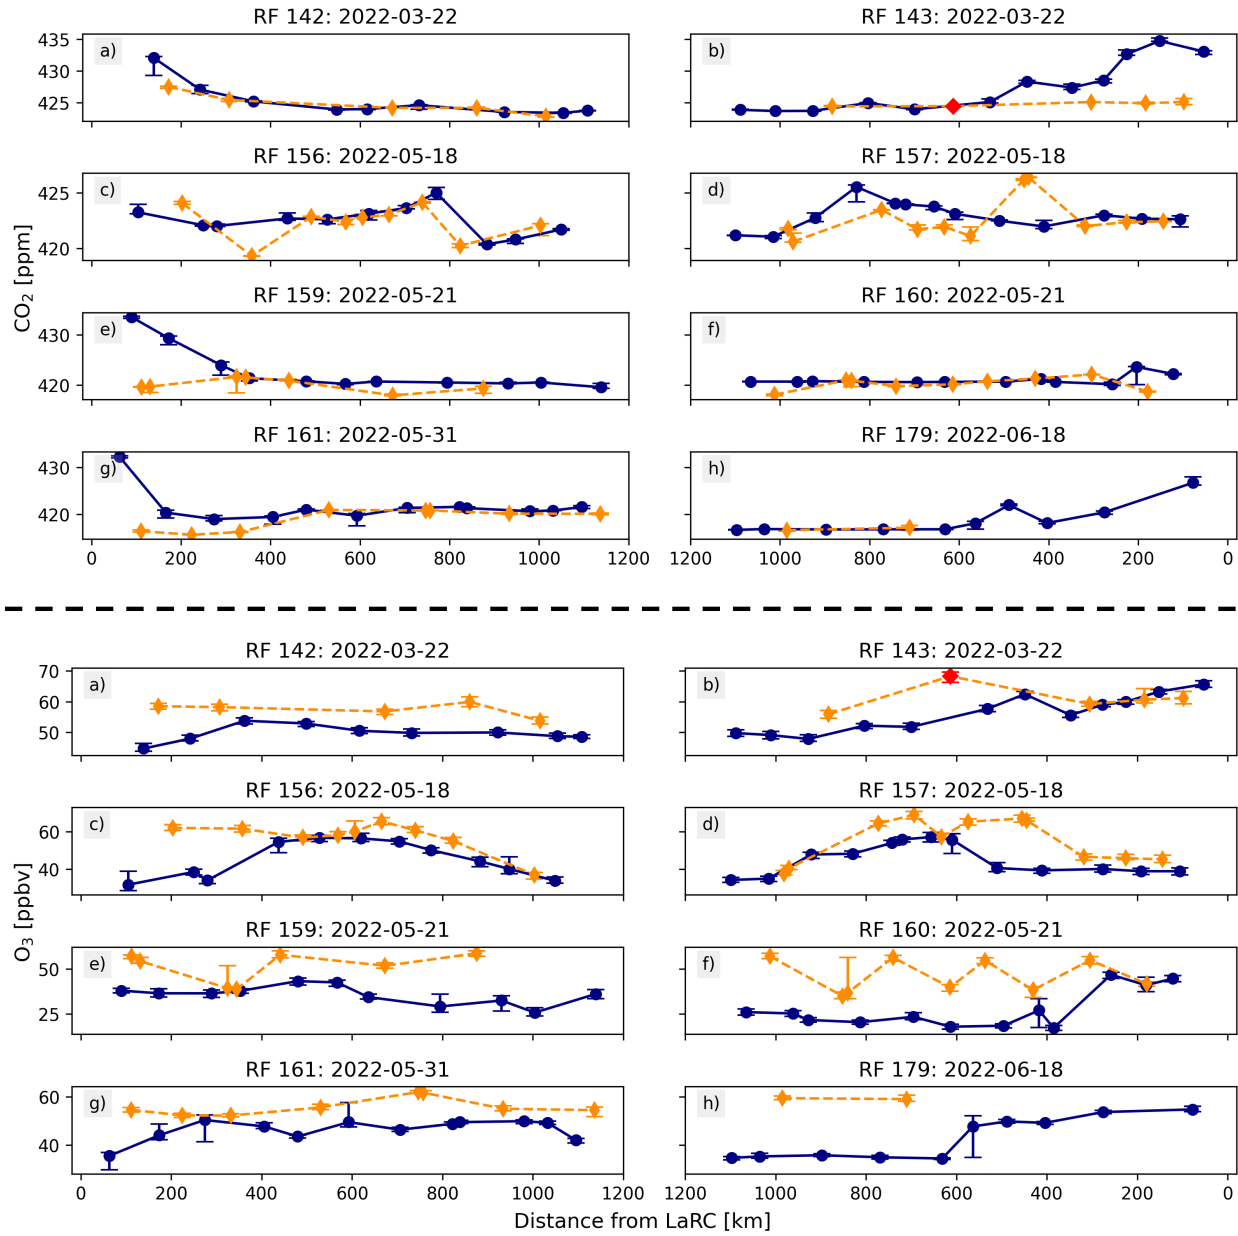

**Figure S5: CO<sub>2</sub> and O<sub>3</sub> concentrations as measured by the HU-25 Falcon as a function of offshore distance from LaRC. Blue and orange represent the BL and FT, respectively. Markers represent median values for 15-minute intervals and whiskers are 25<sup>th</sup>/75<sup>th</sup> percentiles. The smoke layer median value is shown in red for RF 143.**

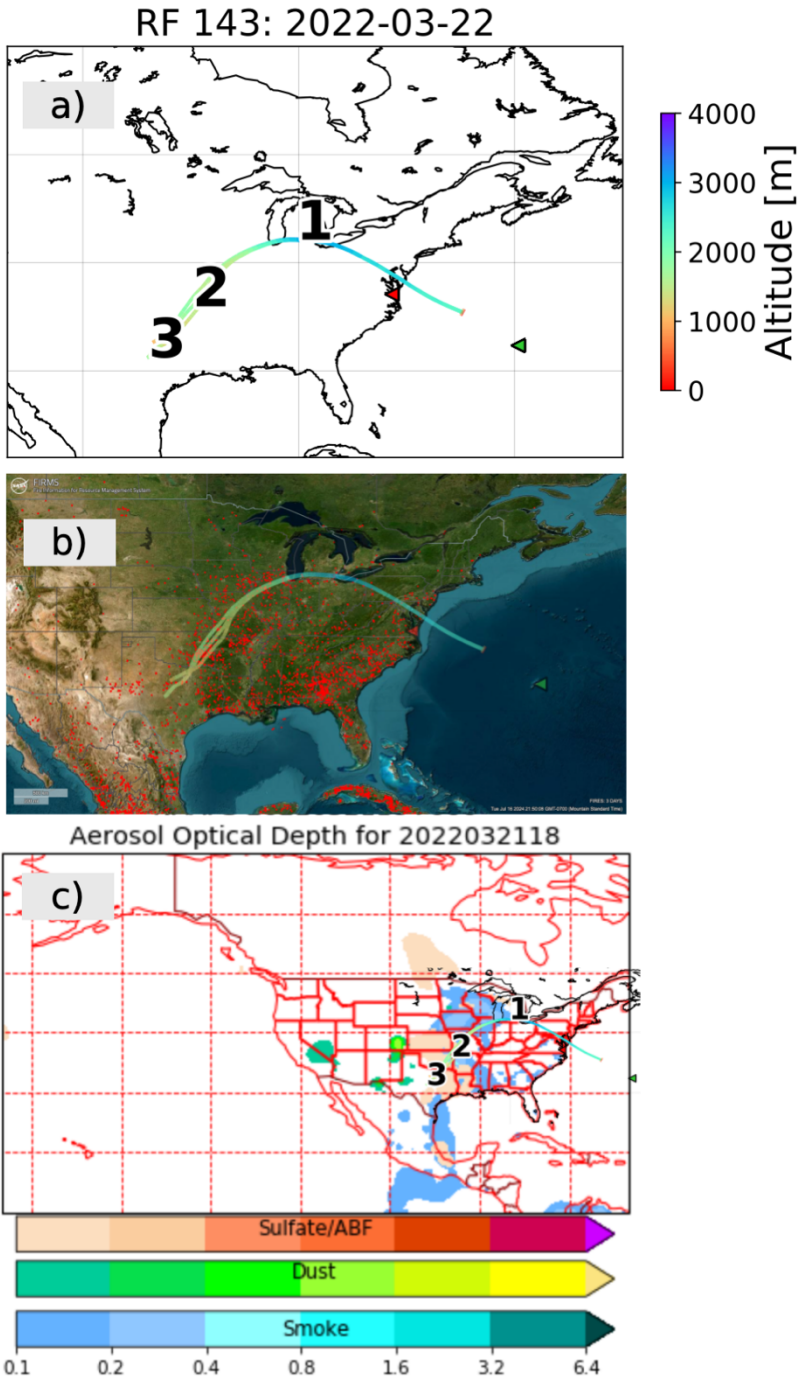

Figure S6: (a) HYSPLIT three-day back trajectories ending at the location of Falcon research flight 143 (22 March 2022) along its flight path while it intersected the smoke layer. Altitude of air mass trajectories shown with color bar and numbers represent the days prior to the initialized point of the back-trajectories. These trajectories are overlaid in panels b-c. (b) NASA's Fire Information for Resource Management System (FIRMS) active fire points in red from 20 May through 22 May 2024. (c) Speciated Navy Aerosol Analysis and Prediction System (NAAPS) aerosol optical depth (smoke in blue) at 18:00 UTC 21 March, approximately 1 day before the smoke layer was intercepted by the aircraft.

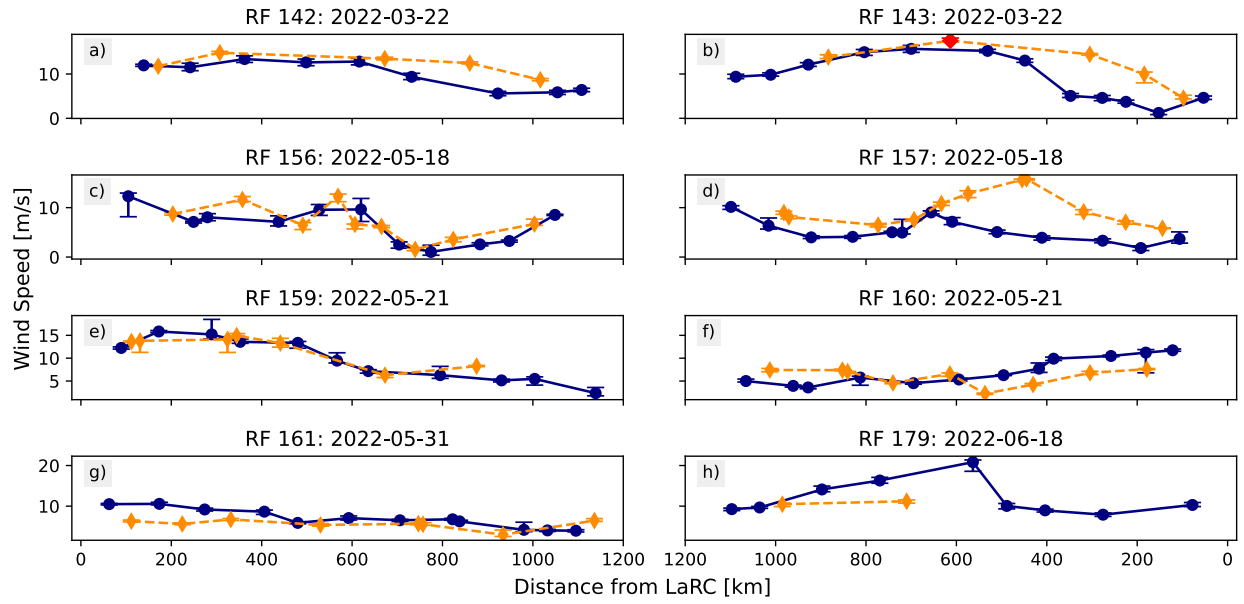

Figure S7: Same as Fig. S5 but for wind speed.

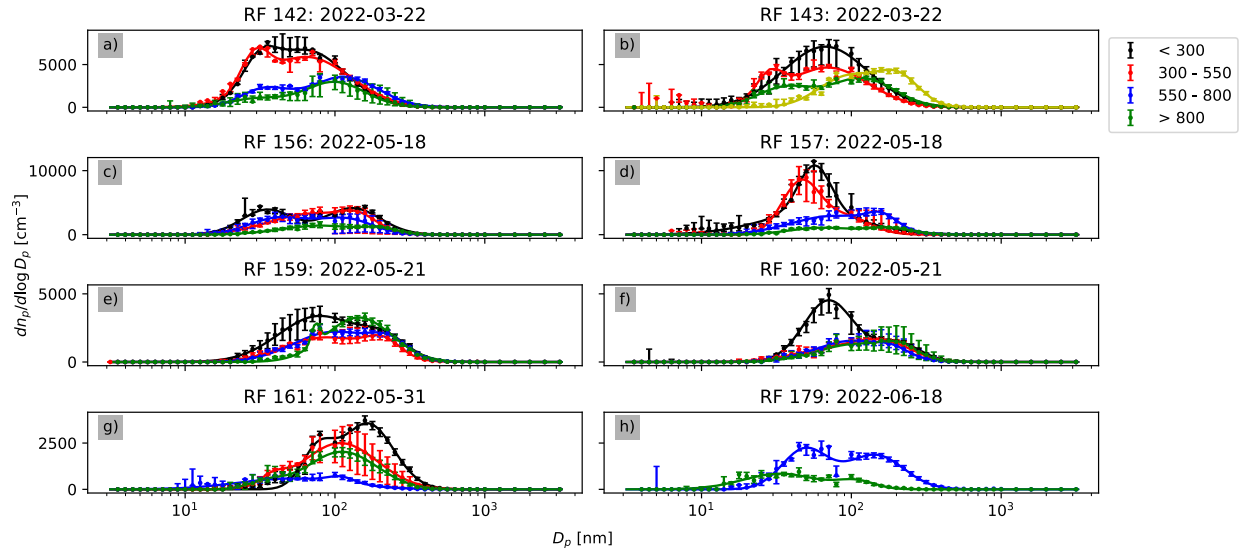

**Figure S8: Median particle size number concentration distributions in the free troposphere with best fit models segmented by four offshore distance ranges (in km) relative to LaRC. 25<sup>th</sup>/75<sup>th</sup> percentiles are signified with error bars. The smoke layer size distribution from RF143 is shown in yellow.**

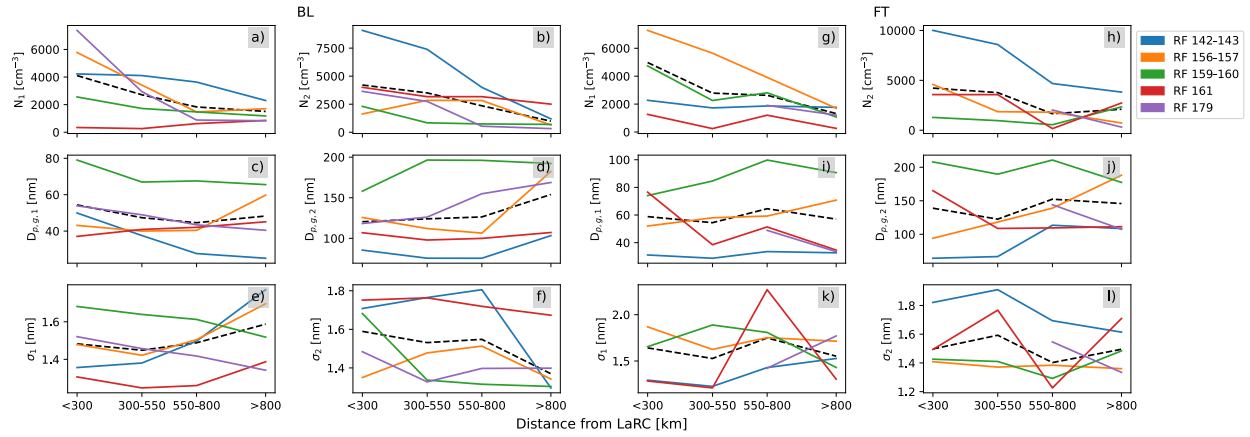

**Figure S9: BL (a-f) and FT (g-l) particle number, geometric mean diameter, and geometric standard deviation of the two-mode lognormal fit versus distance from LaRC. Lines are color coded by flight day. Dotted black line displays mean across days.**

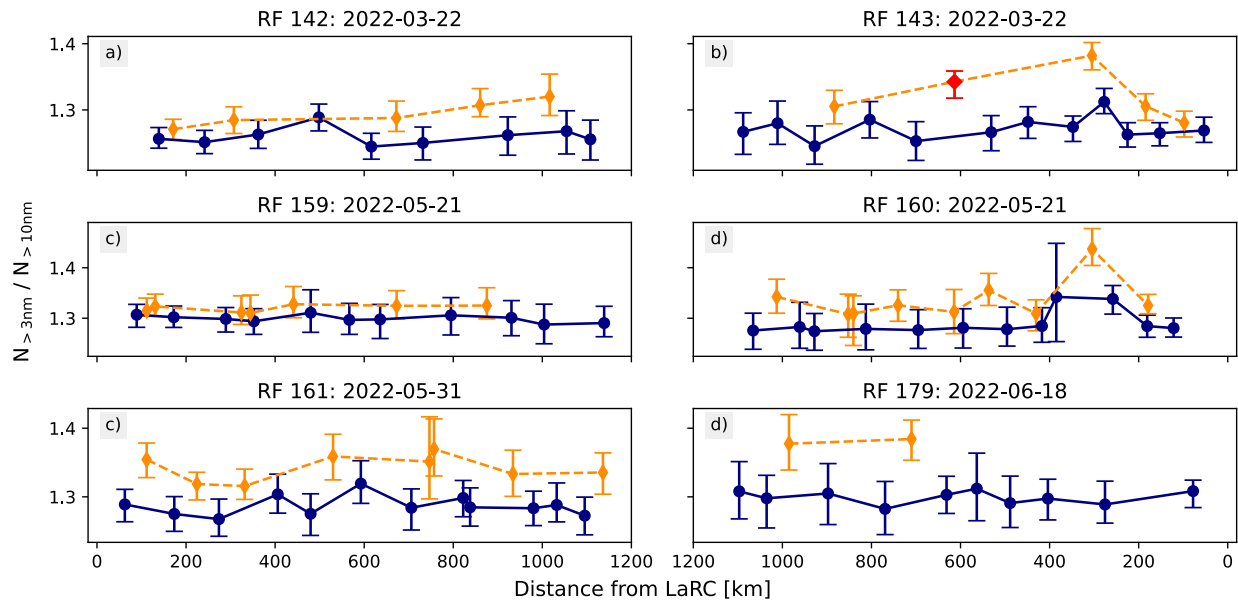

**Figure S10:**  $N_{>3nm}/N_{>10nm}$  for all transit flights except RF 156-157 on 18 May 2022 since data were unavailable. Blue and orange represent the BL and FT, respectively. Markers represent median values for 15-minute intervals and whiskers are 25<sup>th</sup>/75<sup>th</sup> percentiles. Smoke layer median value shown in red for RF 143.

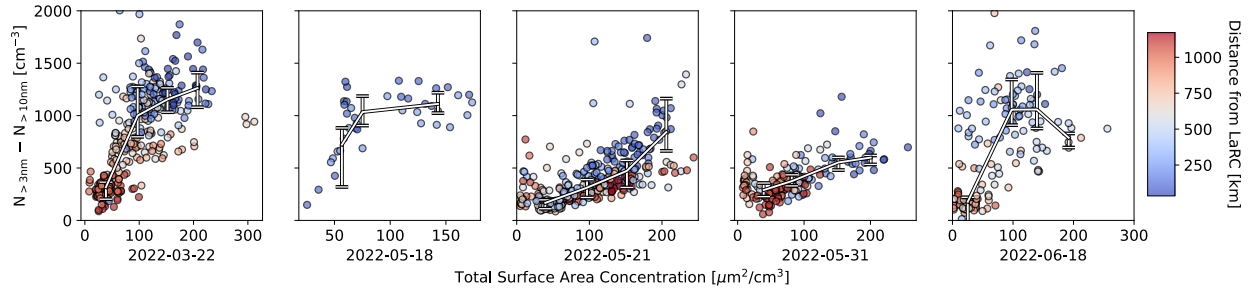

**Figure S11: Combined values in the BL and FT for  $N_{>3 \text{ nm}} - N_{>10 \text{ nm}}$  versus total surface area concentration (summed SMPS and LAS data) colored by distance from LaRC. Error bars representing 25<sup>th</sup> and 75<sup>th</sup> percentiles from binning data every  $100 \mu\text{m}^2 \text{ cm}^{-3}$  are displayed with the white line.**
